# Supplementary material for: A Therapeutic Strategy for Chemotherapy-Resistant Gastric Cancer via Destabilization of Both β-Catenin and RAS
Source: Cancers (Basel). 2019 Apr 8;11(4):496. doi: 10.3390/cancers11040496 (PMC6521309; doi:10.3390/cancers11040496)
Supplement: Supplementary file 1 [file cancers-11-00496-s001.pdf]

## Supplementary Materials

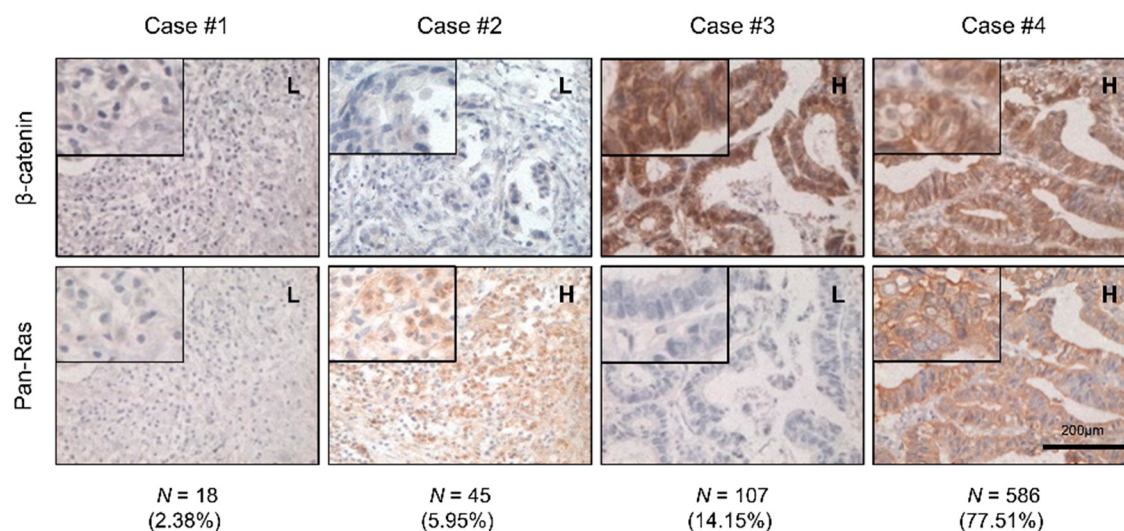

**Figure S1.** Correlative activation and increment of  $\beta$ -catenin and RAS protein level in GC tissue microarrays. Representative images showing the relationship between  $\beta$ -catenin and pan-RAS are presented. Low pattern = L, high pattern = H. Correlations of the activation of  $\beta$ -catenin and pan-RAS were analyzed by *chi*-squared test. The number and percentage of specimens in each category is given below each representative photomicrograph. Scale bar = 200  $\mu$ m, and boxes show images at 400  $\times$  magnification.

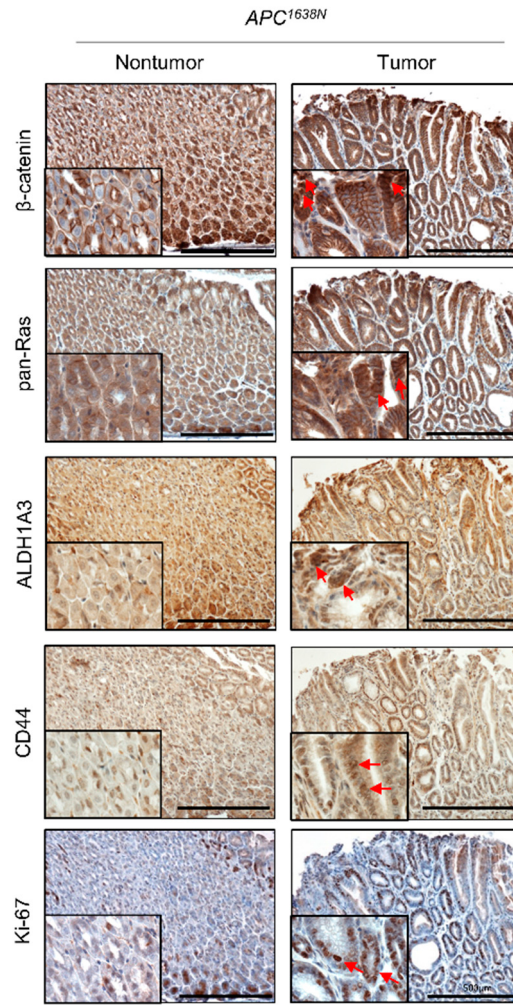

**Figure S2.** The upregulated levels of  $\beta$ -catenin and Ras proteins as well as CSC markers in gastric tumors of *Apc<sup>1638N</sup>* mice compared with those in adjacent normal tissue. Formaldehyde-fixed paraffin sections from gastric tissue of *Apc<sup>1638N</sup>* mice were subjected to IHC staining with the indicated antibodies specific for  $\beta$ -catenin, pan-Ras, CD44, ALDH1A3, or Ki67. Nuclei were counterstained with Mayer's hematoxylin. Scale bar = 500  $\mu$ m.

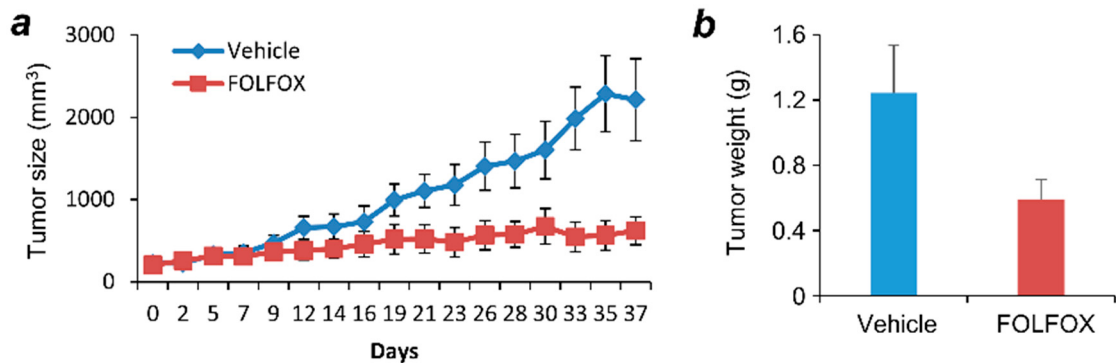

**Figure S3.** The effects of FOLFOX on the *in vivo* growth of GC patient's PDX. (A) Subcutaneous tumor volumes were measured by using calipers. The percentage change in tumor volume was calculated for each animal ( $n = 8$  vehicle and  $n = 9$  FOLFOX mice in each treatment group). Error bars represent means  $\pm$  s.e.m.  $P$ -values were calculated by two-tailed  $t$ -test unless otherwise indicated. (B) The weights of the PDX tumors treated with vehicle or FOLFOX ( $P = 0.0539$ ).

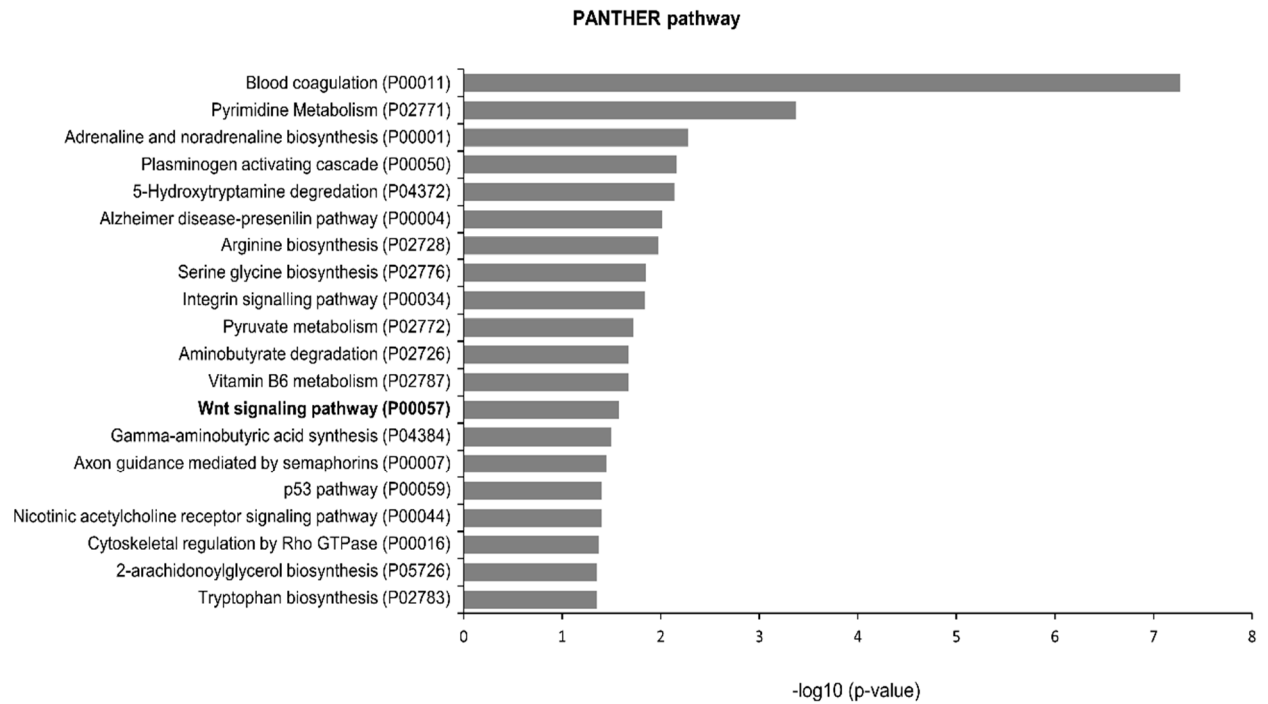

**Figure S4.** Components of the Wnt/ $\beta$ -catenin pathway are enriched in AR-PDX tumors compared with vehicle tumors. Pathway analysis using PANTHER databases. The significantly differentially expressed genes (DEGs) in “Veh vs. AR” described in Figure 3C, D were used for pathway analysis via PANTHER 10.0 pathway annotation. The most enriched pathways with statistical significance are shown. The x-axis shows the minus log 10 scale of  $p$ -values, whereas the y-axis shows each Gene Ontology term.

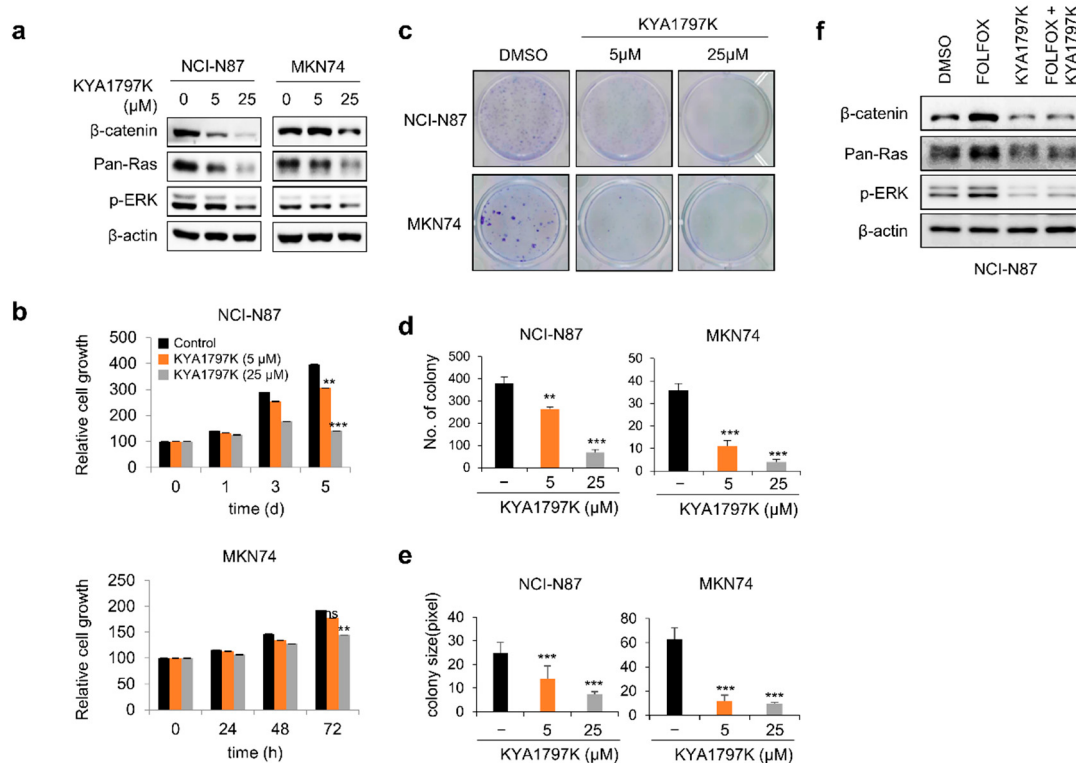

**Figure S5.** Effects of KYA1797K on degradations of  $\beta$ -catenin and pan-Ras, proliferation and transformation of GC cells. NCI-N87 or MKN74 GC cells were cultured as described in the Methods section. **(A)** The cells were cultured and treated with KYA1797K for 24 h. Whole-cell lysates (WCLs) were immunoblotted with the indicated antibodies. **(B)** NCI-N87 and MKN74 cells were treated with 5  $\mu$ M or 25  $\mu$ M KYA1797K. Cell proliferation was quantified using the MTT assay ( $n = 3$ ). **(C–E)** The cells treated with KYA1797K were subjected to colony formation assay for 14 days. The foci in **(D)** and **(E)** were photographed and quantified from three independent experiments (mean  $\pm$  s.d;  $n = 3$ ). \*  $P < 0.05$ , \*\*  $P < 0.005$ , \*\*\*  $P < 0.0005$  versus control by Student's  $t$ -test. **(F)** IB analyses in NCI-N87 cells treated with vehicle, or with FOLFOX (5-FU at 10  $\mu$ g/mL and oxaliplatin at 1  $\mu$ g/mL), KYA1797K (25  $\mu$ M) or both. IB analyses using WCLs were performed by using the indicated antibodies.

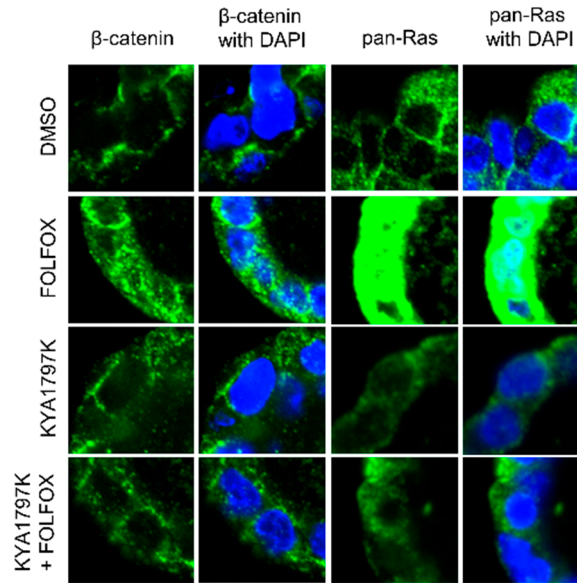

**Figure S6.** Effects of FOLFOX and KYA1797K on the formation of tumoroids from *Apc*<sup>1638N</sup> mice. Magnified images of  $\beta$ -catenin and pan-Ras in Figure 5D for clarifying the localizations of each markers. Nuclei were counter stained with DAPI.

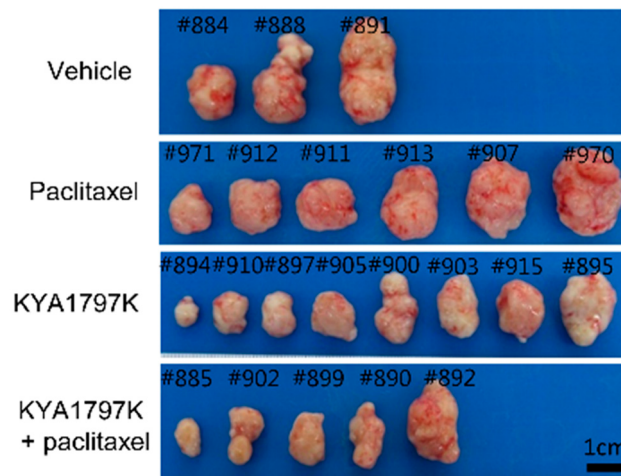

**Figure S7.** The images of PDX tumors treated with vehicle, paclitaxel, KYA1797K, or co-treatment of paclitaxel and KYA1797K. Tumor images were captured at the time of sacrifice. Scale bar = 1 cm.

**Table S1.** Patient characteristics and  $\beta$ -catenin or pan-Ras expression.

|                    | $\beta$ -catenin     |                        | <i>p-value</i> | pan-Ras               |                        | <i>p-value</i> |
|--------------------|----------------------|------------------------|----------------|-----------------------|------------------------|----------------|
|                    | Low ( <i>n</i> = 63) | High ( <i>n</i> = 693) |                | Low ( <i>n</i> = 125) | High ( <i>n</i> = 631) |                |
| <b>Age (years)</b> |                      |                        | 0.8606         |                       |                        | 0.1088         |
| 60 $\geq$          | 32 (50.8%)           | 360 (51.9%)            |                | 73 (58.4%)            | 319 (50.6%)            |                |
| 60<                | 31 (49.2%)           | 333 (48.1%)            |                | 52 (41.6%)            | 312 (49.4%)            |                |
| <b>Sex</b>         |                      |                        | 0.0882         |                       |                        | 0.0464 *       |
| Male               | 35 (55.6%)           | 459 (66.2%)            |                | 72 (57.6%)            | 422 (66.9%)            |                |
| Female             | 28 (44.4%)           | 234 (33.8%)            |                | 53 (42.4%)            | 209 (33.1%)            |                |
| <b>Lauren</b>      |                      |                        | 0.1212         |                       |                        | <0.0001 *      |
| Intestinal         | 27 (42.9%)           | 345 (49.9%)            |                | 41 (32.8%)            | 331 (52.5%)            |                |
| Diffuse            | 36 (57.1%)           | 322 (46.5%)            |                | 82 (65.6%)            | 276 (43.8%)            |                |
| Mix                | 0 (0%)               | 25 (3.6%)              |                | 2 (1.6%)              | 23 (3.7%)              |                |
| <b>pTstage</b>     |                      |                        | 0.8268         |                       |                        | 0.0013 *       |
| pT1                | 0 (0.0%)             | 2 (0.3%)               |                | 2 (1.6%)              | 0 (0.0%)               |                |
| pT2                | 12 (19.0%)           | 106 (15.3%)            |                | 12 (9.6%)             | 106 (16.8%)            |                |
| pT3                | 24 (38.1%)           | 261 (37.7%)            |                | 56 (44.8%)            | 229 (36.3%)            |                |
| pT4                | 27 (42.9%)           | 324 (46.8%)            |                | 55 (44.0%)            | 296 (46.9%)            |                |
| <b>pNstage</b>     |                      |                        | 0.9749         |                       |                        | 0.2231         |
| pN0                | 17 (27.0%)           | 180 (26.0%)            |                | 43 (34.4%)            | 154 (24.4%)            |                |
| pN1                | 13 (20.6%)           | 128 (18.5%)            |                | 20 (16.0%)            | 121 (19.2%)            |                |
| pN2                | 12 (19.0%)           | 145 (20.9%)            |                | 25 (20.0%)            | 132 (20.9%)            |                |
| pN3                | 12 (19.0%)           | 125 (18.0%)            |                | 20 (16.0%)            | 117 (18.5%)            |                |
| pN4                | 9 (14.3%)            | 115 (16.6%)            |                | 17 (13.6%)            | 107 (17.0%)            |                |
| <b>TNM stage</b>   |                      |                        | 0.4477         |                       |                        | 0.0257 *       |
| Stage I            | 4 (6.3%)             | 62 (8.9%)              |                | 8 (6.4%)              | 58 (9.2%)              |                |
| Stage II           | 24 (38.1%)           | 214 (30.9%)            |                | 52 (41.6%)            | 186 (29.5%)            |                |
| Stage III          | 35 (55.6%)           | 417 (60.2%)            |                | 65 (52.0%)            | 387 (61.3%)            |                |

Analysis by chi-square criterion or Fisher's exact test. \*  $P < 0.05$ .
